# Supplementary material
Source: PubMed Central journal article supplement (PMC2718160)
Supplement: mmc1.pdf [file mmc1.pdf]

Biophysical Journal, Volume 97

**Supporting Material**

**Single-Molecule Study of Metalloregulator CueR–DNA Interactions Using Engineered Holliday Junctions**

Nesha May Andoy, Susanta K. Sarkar, Qi Wang, Debashis Panda, Jaime J. Benítez, Aleksandr Kalininskiy, and Peng Chen

## Supporting Information

To

### Single-Molecule Study of Metalloregulator CueR–DNA Interactions Using Engineered Holliday Junctions

*Nesha May Andoy, Susanta K. Sarkar, Qi Wang, Debashis Panda, Jaime J. Benítez, Aleksandr Kalininskiy, and Peng Chen\**

Department of Chemistry and Chemical Biology, Cornell University, Ithaca, New York 14853, U.S.A.

\* To whom correspondence should be address; email: [pc252@cornell.edu](mailto:pc252@cornell.edu)

#### I. Derivation of the single-molecule kinetics of the structural dynamics of HJC2

##### A. Free HJC2

The structural dynamics of a HJ, if measured at the single-molecule level at tens of milliseconds time resolution, follows a two-state kinetics effectively:

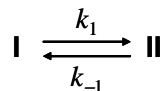

where I denotes conf-I and II denotes conf-II (see also Figure 1 in the main text). The waiting time  $\tau_I$  in the  $E_{\text{FRET}}$  trajectories is the time needed to complete I  $\rightarrow$  II transition; the waiting time  $\tau_{II}$  is to complete II  $\rightarrow$  I transition; both are simple one-step kinetic reactions. The probability density functions for  $\tau_I$  and  $\tau_{II}$ ,  $f_I(\tau)$  and  $f_{II}(\tau)$ , are both single-exponential functions, with  $f_I(\tau) = k_1 \exp(-k_1 \tau)$  and  $f_{II}(\tau) = k_{-1} \exp(-k_{-1} \tau)$ . The inverse of the average waiting times,  $\langle \tau_I \rangle^{-1}$  and  $\langle \tau_{II} \rangle^{-1}$ , which represent the time-averaged single-molecule rates of I  $\rightarrow$  II and II  $\rightarrow$  I transitions respectively, are:

$$\langle \tau_I \rangle^{-1} = \frac{1}{\int_0^{\infty} \tau f_I(\tau) d\tau} = k_1 \quad (\text{A1})$$

$$\langle \tau_{II} \rangle^{-1} = \frac{1}{\int_0^{\infty} \tau f_{II}(\tau) d\tau} = k_{-1} \quad (\text{A2})$$

##### B. Apo-CueR and HJC2 interactions

The kinetic mechanism of apo-CueR interactions with HJC2 is shown in Figure 5A. The kinetic processes happening during  $\tau_I$  are the following kinetic steps:

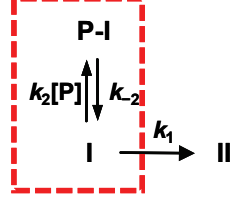

The corresponding single-molecule rate equations are:

$$dP_{II}(t)/dt = k_1 P_I(t) \quad (B1)$$

$$dP_I(t)/dt = -(k_1 + k_2[P])P_I(t) + k_{-2}P_{P-I}(t) \quad (B2)$$

$$dP_{P-I}(t)/dt = k_2[P]P_I(t) - k_{-2}P_{P-I}(t) \quad (B3)$$

where  $P(t)$ 's are the probabilities of finding HJC2 in the corresponding states at time  $t$  and  $k$ 's are the rate constants for the transitions. At the on-set of each  $\tau_1$ , i.e., right after a  $II \rightarrow I$  transition, the first state that HJC2 reaches is I; so the initial conditions for solving the above differential equations are:  $P_I(0) = 1$ ,  $P_{II}(0) = 0$ ,  $P_{P-I}(0) = 0$ , where  $t = 0$  being the on-set of each  $\tau_1$ . And at any time,  $P_I(t) + P_{II}(t) + P_{P-I}(t) = 1$ .

We can then evaluate the probability density function of  $\tau_1$ ,  $f_1(\tau)$ . The probability of finding a particular  $\tau$  is  $f_1(\tau)\Delta\tau$ , which is equal to the probability for HJC2 to switch from I to II between  $\tau$  and  $\tau + \Delta\tau$ ,  $\Delta P_{II}(\tau)$  (1, 2). Therefore,  $f_1(\tau)\Delta\tau = \Delta P_{II}(\tau)$ . In the limit of infinitesimal  $\Delta\tau$ ,  $f_1(\tau)$  is equal to  $dP_{II}(\tau)/d\tau$ . Solving for  $P_{II}(\tau)$  using equations B1-B3 by Laplace transform, the probability density function of  $\tau_1$  is:

$$f_1(\tau) = \frac{k_1 e^{(\alpha+\beta)\tau}}{2\alpha} [\alpha(1 + e^{-2\alpha\tau}) + (\beta + k_{-2})(1 - e^{-2\alpha\tau})]$$

where  $\alpha = -\sqrt{\frac{1}{4}(k_1 + k_{-2} + k_2[P])^2 - k_1 k_{-2}}$  and  $\beta = -\frac{(k_1 + k_{-2} + k_2[P])}{2}$ . Then:

$$\langle \tau_1 \rangle^{-1} = 1 / \int_0^\infty \mathcal{F}_1(\tau) d\tau = \frac{k_1}{1 + [P]/K_{P-I}}$$

where  $K_{P-I} = k_{-2}/k_2$  is the dissociation constant for the apo-CueR-conf-I complex. This equation is given as Eq. 1 in the main text.

The kinetic processes happening during  $\tau_{II}$  are the following kinetic steps:

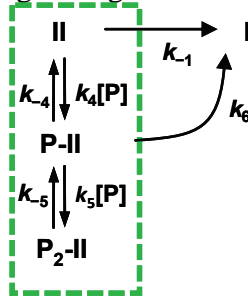

The corresponding single-molecule rate equations are:

$$dP_I(t)/dt = k_{-1}P_{II}(t) + k_6P_{P-II}(t) \quad (B4)$$

$$dP_{II}(t)/dt = -(k_{-1} + k_4[P])P_{II}(t) + k_{-4}P_{P-II}(t) \quad (B5)$$

$$dP_{P-II}(t)/dt = k_4[P]P_{II}(t) - (k_{-4} + k_6 + k_5[P])P_{P-II}(t) + k_{-5}P_{P_2-II}(t) \quad (B6)$$

$$dP_{P_2-II}(t)/dt = k_5[P]P_{P-II}(t) - k_{-5}P_{P_2-II}(t) \quad (B7)$$

The initial conditions for solving above equations are:  $P_{II}(0) = 1$ ,  $P_I(0) = 0$ ,  $P_{P-II}(0) = 0$ , and  $P_{P_2-II}(0) = 0$ . And at any time,  $P_I(t) + P_{II}(t) + P_{P-I}(t) + P_{P_2-II}(t) = 1$ . Similarly,  $f_{II}(\tau) = dP_I(\tau)/d\tau$ . Using equations B4-B7 to solve for  $P_I(\tau)$ , we can obtain  $f_{II}(\tau)$ . Then,

$$\langle \tau_{II} \rangle^{-1} = 1 / \int_0^\infty \mathcal{F}_{II}(\tau) d\tau = \frac{k_{-1} + k_6[P] / K'_{P-II}}{1 + [P] / K'_{P-II} + [P]^2 / (K'_{P-II} K_{P_2-II})}$$

where  $K'_{P-II} = (k_{-4} + k_6)/k_4$  and  $K_{P_2-II} = k_{-5}/k_5$ . This equation is given as Eq 2 in the main text.

### C. Holo-CueR and HJC2 interactions.

The kinetic mechanism for holo-CueR–HJC2 interactions is shown in Figure 5B. The kinetic processes happening during  $\tau_I$  are:

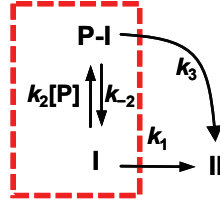

The corresponding single-molecule rate equations are:

$$dP_{II}(t)/dt = k_1P_I(t) + k_3P_{P-I}(t) \quad (C1)$$

$$dP_I(t)/dt = -(k_1 + k_2[P])P_I(t) + k_{-2}P_{P-I}(t) \quad (C2)$$

$$dP_{P-I}(t)/dt = k_2[P]P_I(t) - (k_{-2} + k_3)P_{P-I}(t) \quad (C3)$$

The initial conditions are  $P_I(0) = 1$ ,  $P_{II}(0) = 0$  and  $P_{P-I}(0) = 0$  and at any time,  $P_I(t) + P_{II}(t) + P_{P-I}(t) = 1$ . Similarly,  $f_I(\tau) = dP_{II}(\tau)/d\tau$ , and solving equations C1-C3 for  $P_{II}(\tau)$ , we can obtain  $f_I(\tau)$ , and

$$\langle \tau_I \rangle^{-1} = 1 / \int_0^\infty \mathcal{F}_I(\tau) d\tau = \frac{k_1 + [P]k_3 / K'_{P-I}}{1 + [P] / K'_{P-I}}$$

where  $K'_{P-I} = (k_{-2} + k_3)/k_2$ . This equation is given as Eq. 3 in the main text.

The kinetic processes happening during  $\tau_{II}$  are:

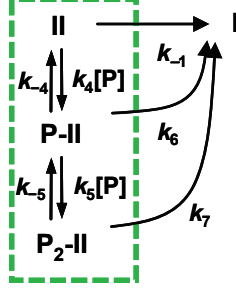

The corresponding single-molecule rate equations are:

$$dP_I(t)/dt = k_{-1}P_{II}(t) + k_6P_{P-II}(t) + k_7P_{P_2-II}(t) \quad (C4)$$

$$dP_{II}(t)/dt = -(k_{-1} + k_4[P])P_{II}(t) + k_{-4}P_{P-II}(t) \quad (C5)$$

$$dP_{P-II}(t)/dt = k_4[P]P_{II}(t) - (k_{-4} + k_6 + k_5[P])P_{P-II}(t) + k_{-5}P_{P_2-II}(t) \quad (C6)$$

$$dP_{P_2-II}(t)/dt = k_5[P]P_{P-II}(t) - (k_{-5} + k_7)P_{P_2-II}(t) \quad (C7)$$

The initial conditions for solving above equations are:  $P_{II}(0) = 1$ ,  $P_I(0) = 0$ ,  $P_{P-II}(0) = 0$ , and  $P_{P_2-II}(0) = 0$ . And at any time,  $P_I(t) + P_{II}(t) + P_{P-II}(t) + P_{P_2-II}(t) = 1$ . Similarly,  $f_{II}(\tau) = dP_I(\tau)/d\tau$ . Using equations C4-C7 to solve for  $P_I(\tau)$ , we can obtain  $f_{II}(\tau)$  and  $\langle \tau_{II} \rangle^{-1}$  for holo-CueR–HJC2 interactions.

Inconveniently, the expressions of the solutions to equations C4–C7 are so tediously complex to hamper their physical understanding. To get a clean analytical expression for  $\langle \tau_{II} \rangle^{-1}$ , we arbitrarily set  $k_{-4} = 0$  and get:

$$\langle \tau_{II} \rangle^{-1} = \frac{k_{-1} + [P](k_{-1}k_7/(k_6K'_{P_2-II}) + k_6/K'_{P-II}) + [P]^2 k_7/(K'_{P-II}K'_{P_2-II})}{1 + [P](k_7/(k_6K'_{P_2-II}) + 1/K'_{P-II}) + [P]^2/(K'_{P-II}K'_{P_2-II})}$$

where  $K'_{P-II} = k_6/k_4$  and  $K'_{P_2-II} = (k_{-5} + k_7)/k_5$ . This equation is given as Eq. 4 in the main text. As this equation can satisfactorily interpret the [holo-CueR] dependence of  $\langle \tau_{II} \rangle^{-1}$ , we use it to fit the holo-CueR data in Figure 4B to obtain other relevant kinetic parameters.

## Reference

1. Xie, X. S. 2001. Single-molecule approach to enzymology. *Single Mol.* 2:229-236.
2. Xu, W., J. S. Kong, and P. Chen. Single-molecule kinetic theory of heterogeneous and enzyme catalysis. *J. Phys. Chem. C.* in press.

## Supporting Figures

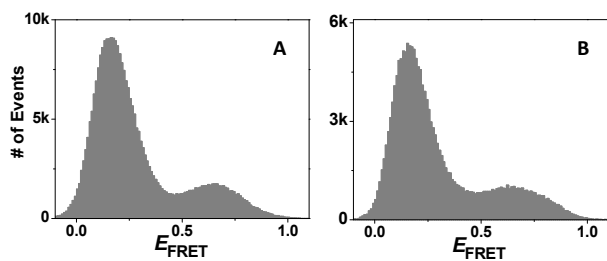

**Figure S1.** Histograms of HJC2  $E_{\text{FRET}}$  trajectories in the absence (A) and presence of 1.0  $\mu\text{M}$  apo-PbrR691 (B). Bin size: 0.01. Each histogram is compiled from more than 100 trajectories

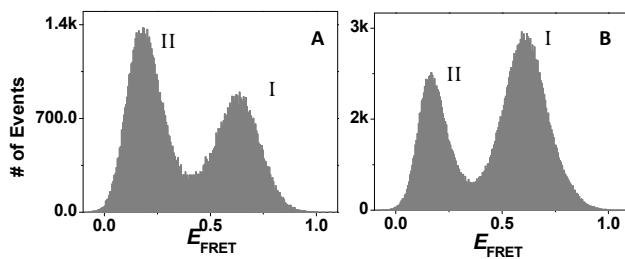

**Figure S2.** Histograms of HJC2  $E_{\text{FRET}}$  trajectories in the presence of 0.5  $\mu\text{M}$  apo-CueR (A) and 3  $\mu\text{M}$  apo-CueR (B). Bin size: 0.005.

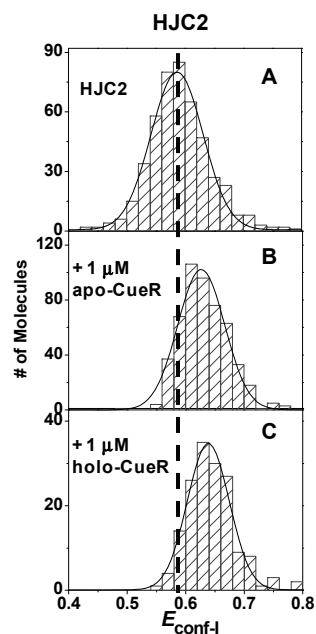

**Figure S3.** Histograms of  $E_{\text{conf-I}}$  of HJC2 (A) in the presence of 1  $\mu\text{M}$  apo-CueR (B) and 1  $\mu\text{M}$  holo-CueR (C). Solid lines are Gaussian fits centered at  $0.59 \pm 0.01$  (A),  $0.63 \pm 0.01$  (B), and  $0.64 \pm 0.01$  (C).

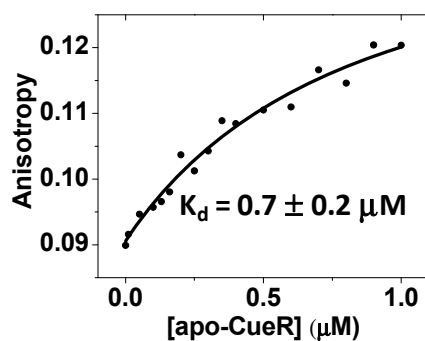

**Figure S4.** Fluorescence anisotropy experiment on Cy-3 labeled double-strand DNA containing only half of the dyad-symmetric sequence (5'-TGACCTTCCCCTTGCTTGGCTTGTT-3', the half sequence is underlined) titrated with apo-CueR. The solid line is the fit using Eq. 5 which gave a  $K_D \sim 0.7 \mu\text{M}$ .

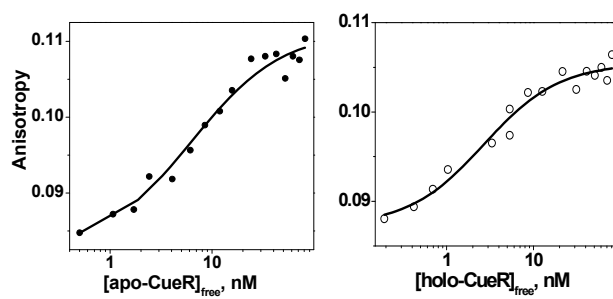

**Figure S5.** Data from Fig. 7 plotted against free protein concentrations.

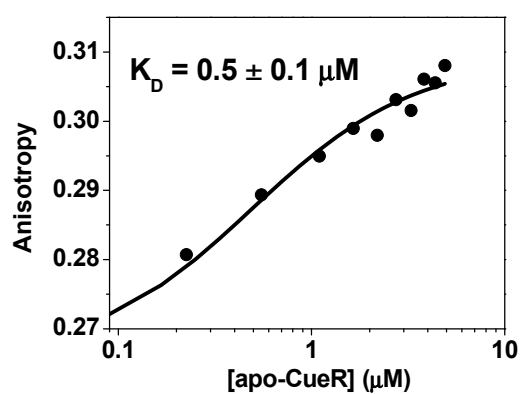

**Figure S6.** Fluorescence anisotropy experiment on Cy3-labeled HJC2 titrated with apo-CueR. The solid line is the fit using Eq. 5 giving a  $K_D \sim 0.5 \mu\text{M}$  which is in between the affinity of apo-CueR to conf-I and to conf-II of HJC2 determined from single-molecule measurements.
